# Supplementary material for: Intramammary Ethno-Veterinary Formulation in Bovine Mastitis Treatment for Optimization of Antibiotic Use
Source: MDPI journal article supplement (doi:10.3390/pathogens12020259), 2023-02-06
Supplement: s1 [file s1]

**Table S1:** Clinical cure rate responses.

[illegible]
